# Supplementary material for: Deconstructing Global Observed and Reanalysis Total Cloud Cover Fields Based on Pacific Climate Modes
Source: MDPI journal article supplement (doi:10.3390/atmos14030456), 2023-02-24
Supplement: s1 [file s1]

Archive with 1 entries (1 files):
- atmosphere-2202887-supplementary.pdf
